# Supplementary material for: Controls and Adaptive Management of Nitrification in Agricultural Soils
Source: PubMed Central journal article supplement (PMC6728921; doi:10.3389/fmicb.2019.01931), 2019-08-30
Supplement: Image_1.pdf [file Image_1.pdf]

Supplemental Figure 1. Relationship of a) soil temperature, b) soil water filled pore space and c) soil pH on functions used to control nitrification rates in DayCent from (Parton et al., 2001).

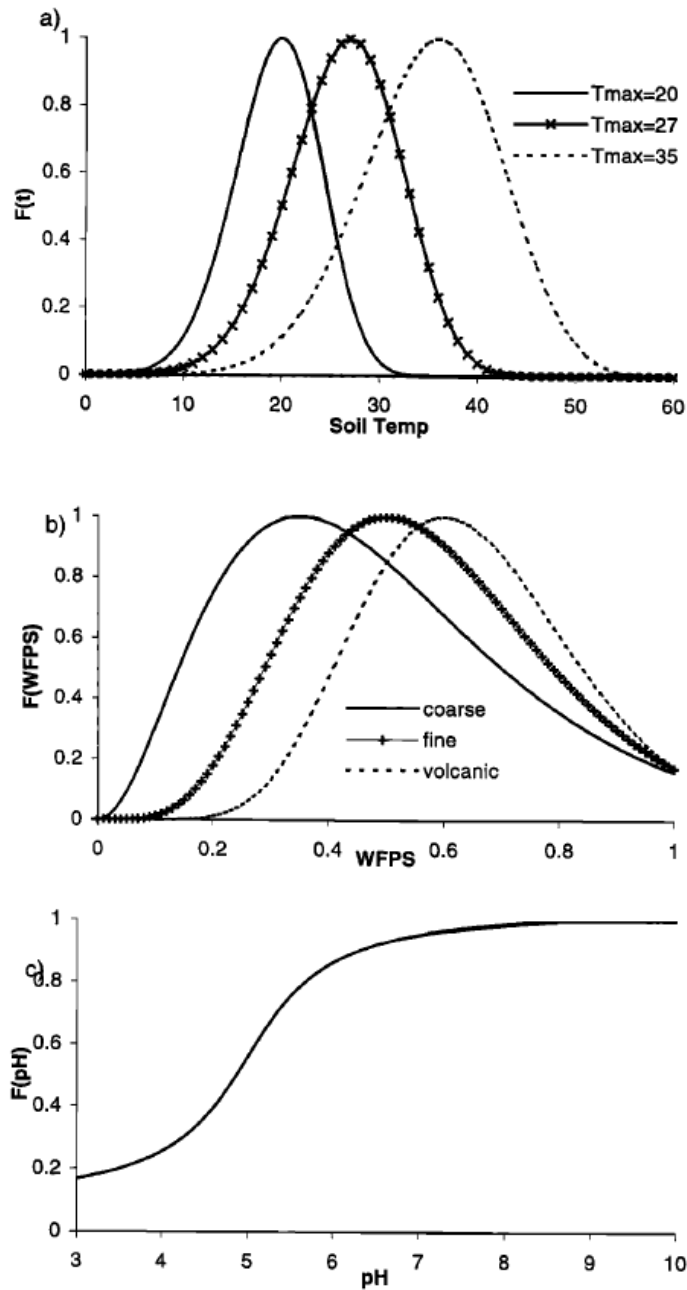

Parton, W.J., Holland, E.A., Del Grosso, S.J., Hartman, M.D., Martin, R.E., Mosier, A.R., et al. (2001). Generalized model for NO<sub>x</sub> and N<sub>2</sub>O emissions from soils. *Journal of Geophysical Research-Atmospheres* 106(D15), 17403-17419. doi: 10.1029/2001jd900101.

AGU grants permission for individuals to use figures, tables, and short quotes from AGU journal and books for republication in academic works and to make single copies for personal use in research, study, or teaching provided full attribution is included. There is no need to request this permission from AGU.
